# Supplementary material for: Sidestream Smoke Extracts from Harm-Reduction and Conventional Camel Cigarettes Inhibit Osteogenic Differentiation via Oxidative Stress and Differential Activation of intrinsic Apoptotic Pathways
Source: MDPI journal article supplement (doi:10.3390/antiox11122474), 2022-12-15
Supplement: s1 [file s1]

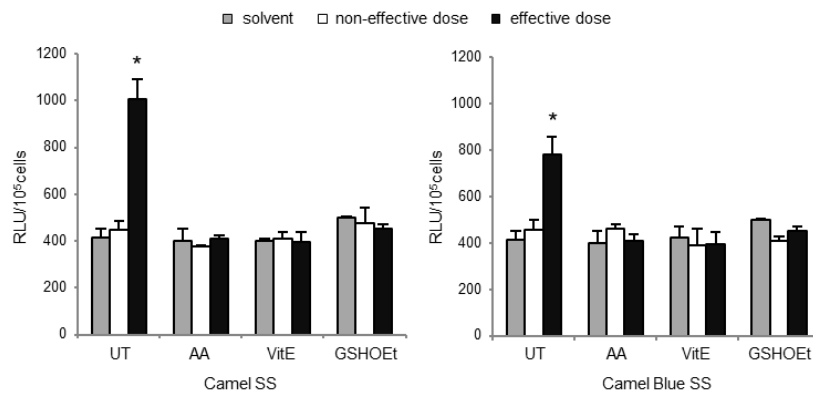

Supplemental Figure S1: Superoxide anion content measured upon reaction of the cells with luminol in response to antioxidant treatment;  $n = 3 \pm \text{SD}$ , \*  $p < 0.05$  One-Way ANOVA versus untreated cultures. AA, ascorbic acid; GSHOEt, glutathione reduced ethyl ester; RLU, relative light unit; UT, untreated solvent control; VitE, Vitamin E.
